# Supplementary material
Source: PubMed Central journal article supplement (PMC7557165)
Supplement: mmc3.pdf [file mmc3.pdf]

## Appendix B. Participant Characteristics

|                                                                                                                                                                           | Responses (N) | (%) |
|---------------------------------------------------------------------------------------------------------------------------------------------------------------------------|---------------|-----|
| <b>How would you rank level of familiarity with rapid reviews? (n=63)</b>                                                                                                 |               |     |
| Extremely familiar                                                                                                                                                        | 12            | 19% |
| Very familiar                                                                                                                                                             | 12            | 19% |
| Somewhat familiar                                                                                                                                                         | 24            | 38% |
| Not so familiar                                                                                                                                                           | 11            | 17% |
| Not at all familiar                                                                                                                                                       | 4             | 6%  |
| <b>In what capacity have you previously participated in a rapid review? (Please check all that apply) (N=63)</b>                                                          |               |     |
| Lead author of a rapid review                                                                                                                                             | 20            | 32% |
| Co-author of a rapid review                                                                                                                                               | 22            | 35% |
| Information specialist                                                                                                                                                    | 7             | 11% |
| Statistician                                                                                                                                                              | 2             | 3%  |
| Methodologist/Epidemiologist                                                                                                                                              | 22            | 35% |
| Clinical expert                                                                                                                                                           | 4             | 6%  |
| Stakeholder (e.g., policymaker, consumer, health professional)                                                                                                            | 2             | 3%  |
| None                                                                                                                                                                      | 24            | 38% |
| Other research capacity (please specify)                                                                                                                                  | 1             | 2%  |
| <b>To what extent do you agree or disagree that the production of Cochrane RRs should be driven primarily by requests for timely evidence for decision-making. (N=59)</b> |               |     |
| Strongly agree                                                                                                                                                            | 31            | 53% |
| Agree                                                                                                                                                                     | 25            | 43% |
| Neither agree nor disagree                                                                                                                                                | 3             | 5%  |
| Disagree                                                                                                                                                                  | 0             | 0%  |
| Strongly disagree                                                                                                                                                         | 0             | 0%  |
| <b>Cochrane Affiliation (Entities) (N=53)</b>                                                                                                                             |               |     |
| Cochrane EMD                                                                                                                                                              | 6             | 11% |
| Cochrane ITS                                                                                                                                                              | 2             | 4%  |
| Cochrane Response                                                                                                                                                         | 1             | 2%  |
| Coordinating Editor                                                                                                                                                       | 7             | 13% |
| Council member                                                                                                                                                            | 1             | 2%  |
| Editorial Board member                                                                                                                                                    | 4             | 8%  |
| Field Executive member                                                                                                                                                    | 3             | 6%  |
| Geographical Centre Executive member                                                                                                                                      | 3             | 6%  |
| Handbook Editor                                                                                                                                                           | 4             | 8%  |
| Information Retrieval Methods Group convenor                                                                                                                              | 2             | 4%  |
| Information Specialist Executive member                                                                                                                                   | 0             | 0%  |
| Managing Editors Executive member                                                                                                                                         | 2             | 4%  |
| MECIR Author                                                                                                                                                              | 2             | 4%  |
| Methods Executive member                                                                                                                                                  | 2             | 4%  |
| Network Senior Editor                                                                                                                                                     | 3             | 6%  |
| Network Associate Editor                                                                                                                                                  | 1             | 2%  |
| Network Support Fellow                                                                                                                                                    | 4             | 8%  |
| Rapid Reviews Advisory Committee member                                                                                                                                   | 6             | 11% |
| Rapid Reviews Methods Group convenor                                                                                                                                      | 4             | 8%  |
| Scientific Committee member                                                                                                                                               | 8             | 15% |
